# Supplementary material
Source: Elsevier journal article supplement (https://www.sciencedirect.com/science/article/pii/S0210569118300081)
Supplement: mmc1 [file S0210569118300081:mmc1.pdf]

**Tabla 1 (Material Electrónico Suplementario).**  
**Ítems de la Encuesta Nacional sobre manejo de vía aérea en Cuidados Intensivos.**

**ASPECTOS ORGANIZATIVOS**

1. Nombre del Hospital.
2. Persona que cumplimenta la encuesta
  - Jefe de Servicio
  - Especialista en manejo de vía aérea
  - Otro
3. Tipo de Hospital
  - Privado
  - Público
  - Consortio
4. ¿Es universitario su Hospital? Sí/No.
5. ¿Se realiza formación de residentes en su Hospital? Sí/No
6. Número aproximado de camas del Hospital.
7. Tipo de UCI:
  - Médica
  - Quirúrgica
  - Coronaria
  - Pediátrica
  - Otra
8. Número aproximado de ingresos anuales en UCI.
9. Número de camas de UCI.
10. Número de profesionales médicos de guardia en UCI (excluyendo MIR).

**MANEJO DE VÍA AÉREA Y MATERIALES**

11. ¿Existe en su Servicio algún experto/líder en vía aérea difícil? Sí/No
12. ¿Se registra en la historia clínica la evaluación de la vía aérea? Sí/No
13. ¿Qué escalas de valoración utiliza habitualmente?
  - Test Mallampati-Samsoon
  - Subluxación mandibular
  - Regla 3:3:2
  - Extensión de la articulación atlantooccipital
  - Cormack-Lehane
  - Otros
  - No se utiliza ninguna escala

14. ¿Existe en su Servicio protocolo escrito de manejo de la vía aérea?

No

Sí, para intubación orotraqueal.

Sí, para el manejo de vía aérea difícil.

Sí, para extubación.

Sí, para extubación en vía aérea difícil.

Sí, para la realización de traqueostomía percutánea

Sí, para casos de autoextubación

15. Cuando se enfrenta a una vía aérea difícil ¿existe documento tipo check-list de objetivos a cumplir?

Sí/No

16. ¿Dispone de carro de vía aérea difícil en su Unidad? Sí/No

17. En caso afirmativo ¿se realizan comprobaciones periódicas de su contenido? Sí/No

18. En caso afirmativo ¿con qué frecuencia se realizan las comprobaciones?

Semanalmente

Cada dos semanas

Cada tres semanas o más

No existe una frecuencia establecida de revisión

19. Tipo de contenido del carro de vía aérea difícil:

Laringoscopios

Tubos endotraqueales

Mascarilla laríngea

Mascarilla laríngea de intubación (®Fastrach)

Videolaringoscopio

Guía de Eschmann o "Gum elastic Boggie"

Fibrobroncoscopio

Set de cricotiroidotomía

Otros

20. Tipos de videolaringoscopio

Tipo sonda: Bonfils.

Con pala rígida estándar: V-MAC

Con pala rígida estándar: C-MAC

Con pala rígida angulada: GlideScope.

Con pala rígida angulada: McGrath

Con canal para tubo endotraqueal integrado: Airtraq

Con canal para tubo endotraqueal integrado: Pentax AWS

Con canal para tubo endotraqueal integrad: C-TRACH

Otros

21. ¿Realizan análisis de las complicaciones e incidentes relacionados con el proceso de intubación/extubación? Sí/No

### **ASPECTOS FORMATIVOS**

22. ¿Existe en su Servicio formación continuada en IOT? Sí/No

23. ¿Existe en su Servicio formación continuada en vía aérea difícil? Sí/No

24. En caso afirmativo ¿es realizada dentro de su Unidad o es formación externa?

En la Unidad

De forma externa

25. ¿Disponen de maniqués de simulación de vía aérea difícil? Sí/No

26. ¿Cree necesario disponer de una Guía Clínica de manejo específico de la vía aérea difícil en Cuidados Intensivos? Sí/No

27. Comentarios y sugerencias.
